# Supplementary material
Source: PubMed Central journal article supplement (PMC4943035)
Supplement: NIHMS739628-supplement-Author_approval_statement_1.pdf [file NIHMS739628-supplement-Author_approval_statement_1.pdf]

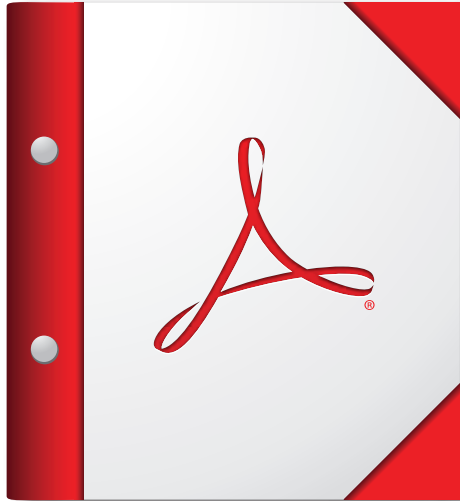

**For the best experience, open this PDF portfolio in  
Acrobat X or Adobe Reader X, or later.**

[Get Adobe Reader Now!](#)
